# Supplementary material for: The proteasome inhibitior bortezomib depletes plasma cells and ameliorates clinical manifestations of refractory systemic lupus erythematosus
Source: HighWire-hosted journal article supplement (doi:10.1136/annrheumdis-2014-206016), 2015-02-26
Supplement: annrheumdis-2014-206016supp_tables.pdf [file annrheumdis-2014-206016supp_tables.pdf]

**Table S1: Patient demographics and baseline disease characteristics of patients receiving bortezomib.**

| Pat. ID | Sex/ Age/ race | Clinical manifestations                                                                   |                                                                | Treatment                                                   |                                                      | SLED AI before Bz | Bortezomib treatment |                  | SLEDAI after last Bz cycle | Therapy 6 months after last Bz cycle | SLEDAI 6 months after last Bz cycle |
|---------|----------------|-------------------------------------------------------------------------------------------|----------------------------------------------------------------|-------------------------------------------------------------|------------------------------------------------------|-------------------|----------------------|------------------|----------------------------|--------------------------------------|-------------------------------------|
|         |                | History                                                                                   | Present at baseline                                            | History                                                     | Present at baseline                                  |                   | Start Date (mm/yyyy) | No. of Bz cycles |                            |                                      |                                     |
| BE #1   | m/24/c         | Nephritis (WHO IV), CNS, serositis, musculoskeletal, mucocutaneous, hematologic, myositis | Nephritis, arthritis, myositis, rash, alopecia                 | CYC, AZA, MTX, HQL, ASCT (-6y), RTX (2x1g, -13 mo)          | CYC (12x1g monthly, -158d), HQL, 20mg Pred           | 20                | 05/2009              | 4                | 4                          | CYC, HQL 10mg Pred                   | 8                                   |
| BE #2   | f/33/c         | Vasculitis, musculoskeletal, mucocutaneous, hematologic, myositis                         | Vasculitis, arthritis, rash, alopecia, hematologic             | CYC, MMF, AZA, HQL, IA, RTX (2x1g, -13 mo)                  | CYC (6x1g monthly, -180d), HQL, 50mg Pred            | 20                | 05/2010              | 2                | 7                          | MTX, HQL 15mg Pred                   | 7                                   |
| BE #3   | f/42/c         | Polyserositis, musculoskeletal, mucocutaneous, hematologic                                | Arthritis, serositis, alopecia, hematologic                    | CYC, AZA, HQL                                               | CYC (6x500mg monthly, -38d), HQL, 5mg Pred           | 13                | 05/2010              | 4                | 2                          | CYC, HQL, 5mg Pred                   | 4                                   |
| BE #4   | f/30/c         | Nephritis (WHO IV), serositis, musculoskeletal, mucocutaneous,                            | Arthritis, serositis, alopecia                                 | CYC, MMF, AZA, HQL, IA RTX (2x1g, -20mo)                    | CYC (6x1g monthly, -179d), 20mg Pred                 | 10                | 12/2010              | 4                | 2                          | HQL, AZA, 7.5mg Pred                 | 4                                   |
| BE #5   | m/26/b         | Nephritis (WHO IV), musculoskeletal, mucocutaneous                                        | Nephritis, rash, nephrotic syndrome                            | CYC, AZA, HQL                                               | CYC (6x1g monthly, -32d), HQL, RTX (1x1g), 10mg Pred | 10                | 08/2011              | 1                | 4                          | MMF, RTX, HQL, 7.5mg Pred            | 2                                   |
| BE #6   | f/35/c         | Arthritis, musculoskeletal, mucocutaneous                                                 | Arthritis, rash, oral ulcer, alopecia                          | AZA, MTX, LEF, HQL                                          | AZA (100mg/d, -24d), HQL, 10mg Pred                  | 14                | 12/2011              | 1                | 4                          | AZA, HQL, BEL, 10mg Pred             | 6                                   |
| BE #7   | m/35/c         | Nephritis (WHO IV), CNS, serositis, musculoskeletal, mucocutaneous, APS, hematologic,     | Arthritis, rash, terminal renal failure, hematologic           | CYC, AZA, MTX, HQL, IVIG, CsA, TAC, RTX (2x1g - 24mo)       | 10mg Pred                                            | 10                | 07/2012              | 1                | 4                          | BEL, 10mg Pred                       | 4                                   |
| BE #8   | f/40/c         | CNS, serositis, musculoskeletal, mucocutaneous, APS, hematologic                          | Arthritis, serositis, alopecia, hematologic                    | CYC, AZA, MTX, HQL, MMF, IVIG                               | 10mg Pred                                            | 13                | 11/2012              | 2                | 4                          | BEL, 7.5mg Pred                      | 5                                   |
| ER #1   | f/30/c         | Nephritis (WHO IV), serositis, musculoskeletal, mucocutaneous, hematologic                | Arthritis, serositis, rash, oral ulcer, terminal renal failure | MTX, AZA, CsA, CQN, TAC, MMF, CYC, RTX (2x1g, -7mo),        | CYC (1g monthly, -30d), 60mg Pred                    | 18                | 05/2008              | 2 <sup>1</sup>   | 7                          | HQL, 5mg Pred                        | 8                                   |
| ER #2   | f/25/c         | Nephritis (WHO IV), CNS, musculoskeletal, mucocutaneous, hematologic                      | Nephritis, arthritis, rash, alopecia                           | MMF, AZA, MTX, CQN, HQL, LEF, RTX (3x1g, -63d),             | CYC (1g monthly, -28d), 20mg Pred                    | 21                | 12/2008              | 2 <sup>1</sup>   | 8                          | TAC, 5mg Pred                        | 4                                   |
| ER #3   | f/34/c         | Nephritis (WHO IV), CNS, vasculitis, musculoskeletal, mucocutaneous, hematologic          | Nephritis, arthritis                                           | CQN, CYC, MMF, RTX (2x1g, -17mo)                            | CYC (1g monthly, -21d), 50mg Pred                    | 14                | 12/2008              | 3 <sup>1</sup>   | 6                          | MMF, HQL 5mg Pred                    | 2                                   |
| KO #1   | m/29/c         | Nephritis (WHO IV), CNS, vasculitis, serositis, musculoskeletal, fever, hematologic       | Nephritis, arthritis, myositis, hematologic                    | MTX, MMF, AZA, CsA, HQL, TAC, RTX (2x1g, -36mo), ASCT (-2y) | MMF (2g/d, -8d), 100mg Pred                          | 18                | 02/2009              | 4                | 8                          | MMF, 10mg Pred                       | 4                                   |

APS = antiphospholipid syndrome, ASCT = autologous stem cell transplantation, AZA = azathioprine, Bz = bortezomib, BEL = belimumab, CQN = chloroquine, CNS = central nervous system, CYC = cyclophosphamide, CsA = ciclosporine A, HQL = hydroxychloroquine, IA = immunoadsorption, IVIG = intravenous immunoglobulins, LEF = leflunomide, MMF = mycophenolate mofetil, MTX = methotrexate, Pred = prednisolone, RTX = rituximab, TAC = tacrolimus, race: c = caucasian, b = black, time baseline treatment was discontinued before bortezomib as depicted in brackets: y = years, mo = months, d = days.

<sup>1</sup> Bortezomib cycle consisted of treatment on day 1, 4, 8

**Table S2: Patient demographics and baseline disease characteristics of patients receiving bortezomib without coadministration of dexamethasone.**

| Pat. ID | Sex/ Age/ race | Clinical manifestations                                                  |                                       | Treatment                                               |                                            | SLED AI before Bz | Bortezomib treatment |                  | SLEDAI after last Bz cycle | Therapy 6 months after last Bz cycle | SLEDAI 6 months after last Bz cycle |
|---------|----------------|--------------------------------------------------------------------------|---------------------------------------|---------------------------------------------------------|--------------------------------------------|-------------------|----------------------|------------------|----------------------------|--------------------------------------|-------------------------------------|
|         |                | History                                                                  | Present at baseline                   | History                                                 | Present at baseline                        |                   | Start Date (mm/yyyy) | No. of Bz cycles |                            |                                      |                                     |
| ER #4   | f/34/c         | Nephritis (WHO ), serositis, musculoskeletal, mucocutaneous, hematologic | Nephritis, hematologic                | AZA, MMF, CYC, CsA, HQL, RTX (2x1g, -297d), TOC (-120d) | TAC, MMF, 7.5 mg Pred                      | 9                 | 09/2009              | 4                | 8                          | RTX, MMF, 5mg Pred                   | 4                                   |
| ER #5   | f/30/c         | Serositis, musculoskeletal, mucocutaneous, hematologic                   | Arthritis, fever                      | MTX, AZA, CQN, MMF, CYC, ETA, IA, RTX 2x1g, -159d),     | CYC (2x800mg, -96d) 50mg Pred              | 8                 | 10/2009              | 6                | 2                          | RTX, MMF, 5mg Pred                   | 2                                   |
| HE #1   | f/22/c         | Nephritis (WHO IV), CNS, vasculitis, APS, serositis, hematologic         | Nephritis, CNS, vasculitis, serositis | CYC, AZA, RTX (2x1g, -17d)                              | CYC 1g monthly, -30d 500mg Pred            | 33                | 12/2011              | 4 <sup>1</sup>   | 12                         | MMF, HQL, 5mg Pred                   | 4                                   |
| FR #1   | f/42/c         | Nephritis (WHO IV), CNS, serositis                                       | Nephritis with terminal renal failure | AZA, CYC, MMF, CsA                                      | CYC (6x1g, -143d), PP, BEL (-12d) 5mg Pred | 22                | 05/2012              | 3                | 14                         | 5mg Pred                             | 17                                  |

APS = antiphospholipid syndrome, AZA = azathioprine, BEL = belimumab, CQN = chloroquine, CNS = central nervous system, CYC = cyclophosphamide, CsA = ciclosporine A, ETA = etanercept, HQL = hydroxychloroquine, IA = immunoabsorption, MMF = mycophenolate mofetil, MTX = methotrexate, PP = plasmapheresis, Pred = prednisolone, RTX = rituximab, TAC = tacrolimus, TOC = tocilizumab, race: c = Caucasian, time baseline treatment was discontinued before bortezomib as depicted in brackets: y = years, mo = months, d = days.

<sup>1</sup> Bortezomib cycle consisted of treatment on day 1, 4, 8

**Table S3: List of adverse events in SLE patients (n=12) during bortezomib treatment.**

| Body System / ADR term             | Number of adverse events | Severity Grade | Severe adverse event | Outcome  | Adverse event leading to discontinuation of Bortezomib |
|------------------------------------|--------------------------|----------------|----------------------|----------|--------------------------------------------------------|
| <b>Allergy/Immunology</b>          | <b>4</b>                 |                |                      |          |                                                        |
| Fever                              | 2                        | mild           | 2                    | resolved | 2                                                      |
| Allergic skin reaction             | 2                        | mild           | 0                    | resolved | 2                                                      |
| <b>Gastrointestinal</b>            | <b>4</b>                 |                |                      |          |                                                        |
| Nausea                             | 3                        | mild           | 0                    | resolved | 0                                                      |
| Diarrhea                           | 1                        | mild           | 0                    | resolved | 0                                                      |
| <b>Infection</b>                   | <b>3</b>                 |                |                      |          |                                                        |
| Herpes zoster                      | 1                        | moderate       | 1                    | resolved | 0                                                      |
| Common cold                        | 1                        | mild           | 0                    | resolved | 0                                                      |
| Urinary tract infection            | 1                        | mild           | 1                    | resolved | 1                                                      |
| <b>Musculoskeletal/Soft tissue</b> | <b>1</b>                 |                |                      |          |                                                        |
| Myalgia                            | 1                        | mild           | 0                    | resolved | 0                                                      |
| <b>Metabolic/Laboratory</b>        | <b>2</b>                 |                |                      |          |                                                        |
| Thrombocytopenia                   | 2                        | mild           |                      | resolved |                                                        |
| <b>Neurology</b>                   | <b>5</b>                 |                |                      |          |                                                        |
| Polyneuropathy                     | 2                        | mild           | 0                    | resolved | 2                                                      |
| Headache                           | 3                        | mild           | 0                    | resolved | 0                                                      |
| <b>Total</b>                       | <b>19</b>                |                | <b>4/19</b>          |          | <b>7/19</b>                                            |
